# Supplementary material for: Behavior Change Content, Understandability, and Actionability of Chronic Condition Self-Management Apps Available in France: Systematic Search and Evaluation
Source: PubMed Central journal article supplement (PMC6735304; doi:10.2196/13494), 2019-08-26
Supplement: mhealth_v7i8e13494_app2.pdf [file mhealth_v7i8e13494_app2.pdf]

### Google Play store search

500 first “TOP” apps in “Médecine” category +

55 available first “TOP” paid apps in “Médecine” category +

20 first apps found for each keyword (total of 240 apps) as shown in the table below:

| Category                | Keywords                                                                      |
|-------------------------|-------------------------------------------------------------------------------|
| Cardiovascular diseases | maladie cardiaque, maladie coeur, AVC accident vasculaire cérébral, infarctus |
| Respiratory diseases    | maladie pulmon, asthme, BPCO, maladie respiratoire,                           |
| Diabetes                | diabète, diabète type 1, diabète type 2                                       |
| Cancer                  | cancer                                                                        |

### Literature Search

| Category           | Medical Subject headings (MeSH)                                                           | Keywords                                                                                                                                                                                                                                                                                                                                     |
|--------------------|-------------------------------------------------------------------------------------------|----------------------------------------------------------------------------------------------------------------------------------------------------------------------------------------------------------------------------------------------------------------------------------------------------------------------------------------------|
| Chronic conditions | Cardiovascular Diseases, Respiratory Tract Diseases, Neoplasms, Diabetes Mellitus, Asthma | diabet* OR cardiovascular OR cardiac OR myocardial OR coronary OR heart OR stroke OR cerebrovascular OR vascular OR asthma* OR respiratory OR lung OR cystic fibrosis OR pulmonary OR cancer OR cancers OR carcinoma OR carcinomas OR tumor OR tumors OR tumour OR tumous OR malignant OR malignancy OR malignancies OR leukemia OR lymphoma |
| Self-management    | Self-management, Self Care                                                                | Self-management OR selfmanag* OR self-care OR selfcar*                                                                                                                                                                                                                                                                                       |

|              |  |                                                                                  |
|--------------|--|----------------------------------------------------------------------------------|
| mHealth apps |  | mobile OR smartphone* OR android* OR app OR apps OR iphone* OR ipad* OR m-health |
|--------------|--|----------------------------------------------------------------------------------|

## Search strategies:

### PubMed

("Cardiovascular Diseases"[Mesh] OR "Respiratory Tract Diseases"[Mesh] OR "Neoplasms"[Mesh] OR "Diabetes Mellitus"[Mesh] OR diabet\*[tw] OR "cardiovascular"[tw] OR "cardiac"[tw] OR "myocardial"[tw] OR "coronary"[tw] OR "heart"[tw] OR "stroke"[tw] OR "cerebrovascular"[tw] OR "vascular"[tw] OR "Asthma"[Mesh] OR asthma\*[tw] OR "respiratory"[tw] OR "lung"[tw] OR "cystic fibrosis"[tw] OR "pulmonary"[tw] OR "cancer"[tw] OR "cancers"[tw] OR "carcinoma"[tw] OR "carcinomas"[tw] OR "tumor"[tw] OR "tumors"[tw] OR "tumour"[tw] OR "tumous"[tw] OR "malignant"[tw] OR "malignancy"[tw] OR "malignancies"[tw] OR "leukemia"[tw] OR "lymphoma"[tw]) AND

("Self-Management"[Mesh] OR "self management"[tw] OR selfmanag\*[tw] OR "Self Care"[Mesh] OR "self care"[tw] OR selfcar\*[tw]) AND

(mobile[tw] OR smartphone\*[tw] OR android\*[tw] OR app[tw] OR apps[tw] OR iphone\*[tw] OR ipad\*[tw] OR m-health[tw]) AND ("2012"[Date - Create] : "3000"[Date - Create]) AND (("2012/01/01"[PDat] : "3000/12/31"[PDat]))

### IEEE

**((((("smart phone" OR mobile\* OR personal computing OR app) AND (self-management OR self-care OR self manag\* OR self car\*)) AND ((cardiovascular diseases OR cardiac disease OR heart disease) OR diabetes OR (cancer OR myeloma OR lymphedema) OR (pulmonary\* OR asthma))))))**

### WoS

#1 - TS=(mHealth OR mobile\* OR smart phone OR app OR android)

#2 - TS=(self-management OR self-care OR self manag\* OR self car\*)

#3 - #1 AND #2

#4 - TS=("cardiovascular diseases" OR heart diseases OR vascular diseases OR heart attack OR heart failure)

#5 - TS=("diabetes mellitus" OR diabetes OR type 1 diabetes OR type 2 diabetes)

#6 - TS=(cancer OR neoplasm OR lymphoma OR leukemia)

#7 - TS=("respiratory tract diseases" OR "pulmonary diseases" OR asthma OR "chronic obstructive pulmonary disease")

#8 - #4 OR #5 OR #6 OR #7

#9 - #3 AND #8
